# Supplementary material for: Insights into the electronic bands of WO3/BiVO4/TiO2, revealing high solar water splitting efficiency
Source: Royal Society of Chemistry journal article supplement (doi:10.1039/c6ta07592d), 2016-10-25
Supplement: c6ta07592d1.pdf [file c6ta07592d1.pdf]

## Supplementary information

### **Insights into Electronic Bands of WO<sub>3</sub>/BiVO<sub>4</sub>/TiO<sub>2</sub>, Revealing High Solar Water Splitting Efficiency**

Shankara S. Kalanur, Il-Han Yoo, Jucheol Park and Hyungtak Seo,\*

E-mail: [hseo@ajou.ac.kr](mailto:hseo@ajou.ac.kr)

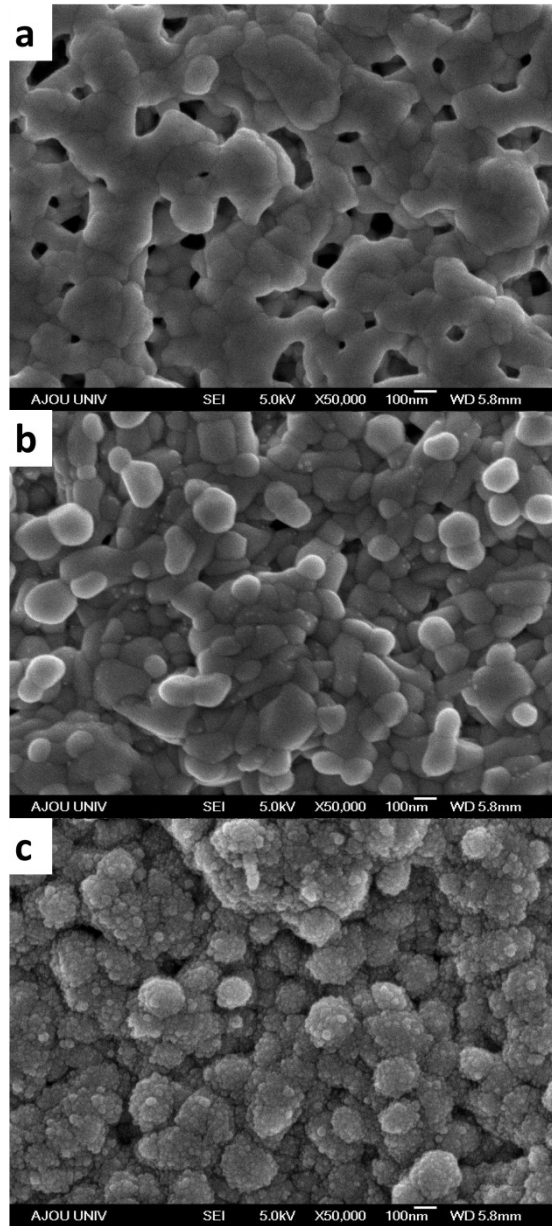

**Figure S1.** (a) Top view SEM image of BiVO<sub>4</sub> deposited on WO<sub>3</sub> without the organic binder ethyl cellulose and (b) with ethyl cellulose. (c) 5-nm-thick TiO<sub>2</sub> electrochemically deposited onto WO<sub>3</sub>/BiVO<sub>4</sub>.

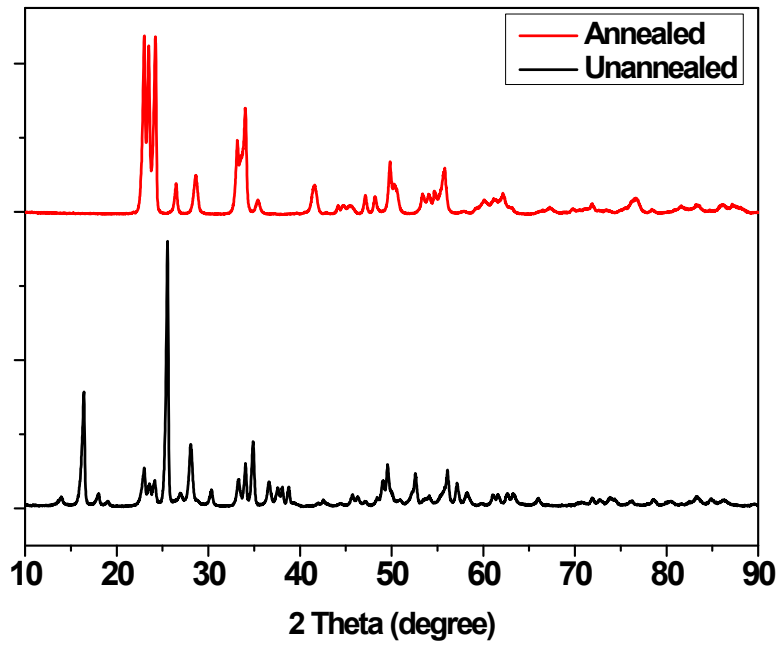

**Figure S2.** XRD patterns for the as-synthesized orthorhombic (black line) and annealed (500 °C) monoclinic  $\text{WO}_3$  nanostructures.

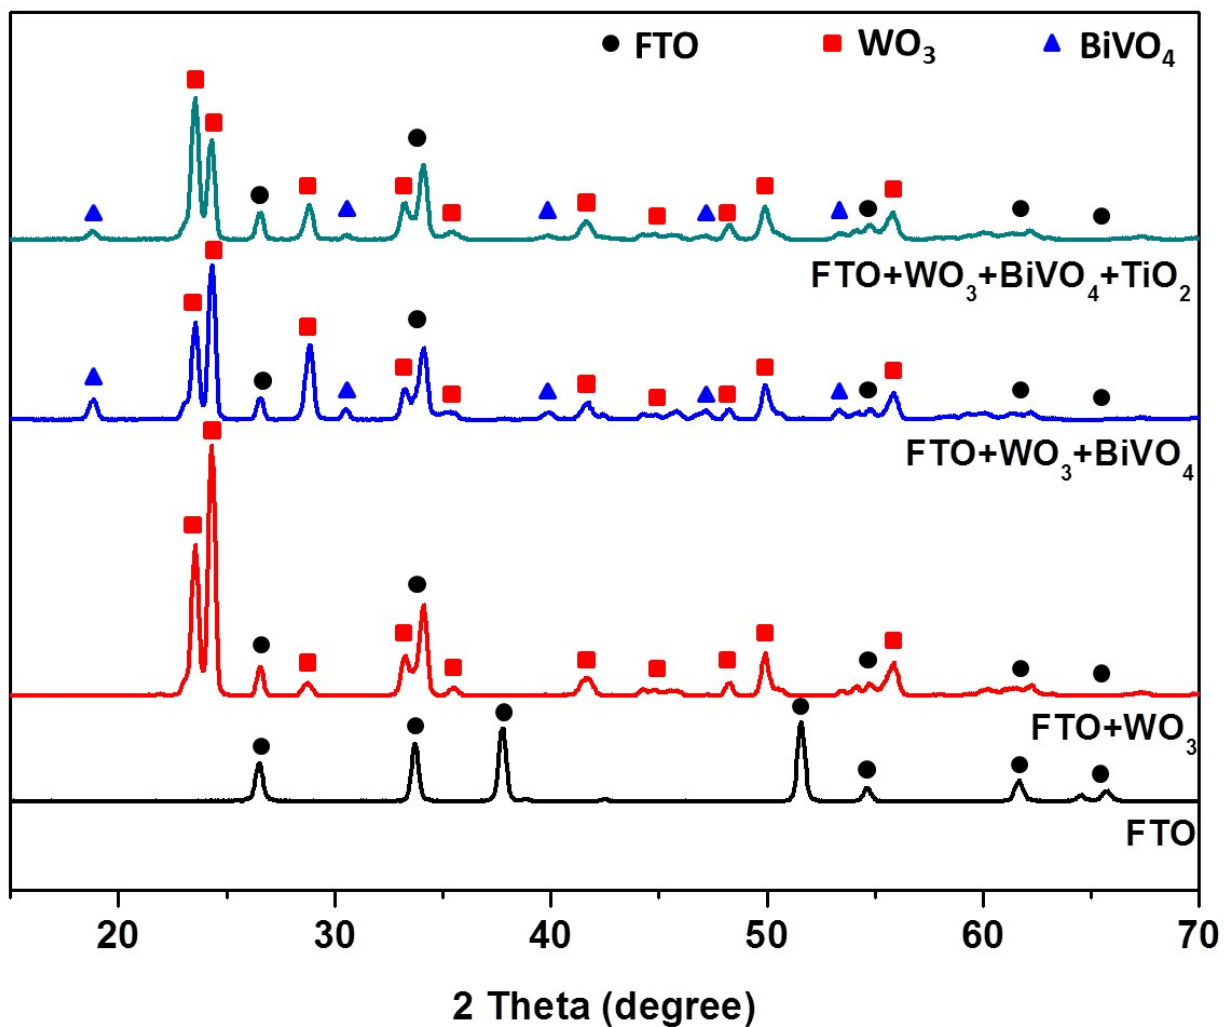

**Figure S3.** XRD patterns for FTO (black line), FTO/WO<sub>3</sub> (red line), FTO/WO<sub>3</sub>/BiVO<sub>4</sub> (blue line), and FTO/WO<sub>3</sub>/BiVO<sub>4</sub>/TiO<sub>2</sub> (green line). The peaks for FTO, WO<sub>3</sub>, and BiVO<sub>4</sub> are indicated with black circles, red squares, and blue triangles, respectively. TiO<sub>2</sub> peaks could not be seen, most probably due to the thinness of the TiO<sub>2</sub> layer and the high intensity of the peaks for the other materials.

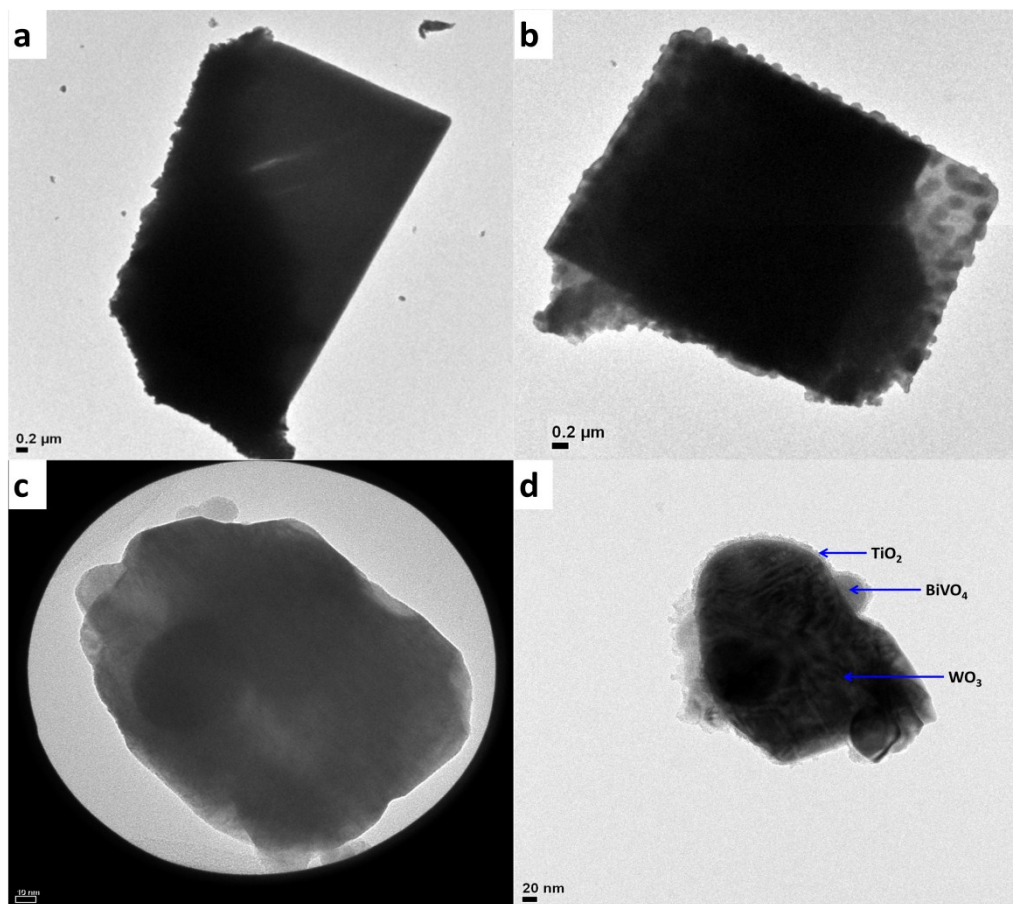

**Figure S4.** TEM images of the  $\text{WO}_3$  plate structures (a) without and (b) with  $\text{BiVO}_4$ . TEM images of the porous  $\text{WO}_3$  structures (c) without and (d) with  $\text{BiVO}_4$  and  $\text{TiO}_2$ .

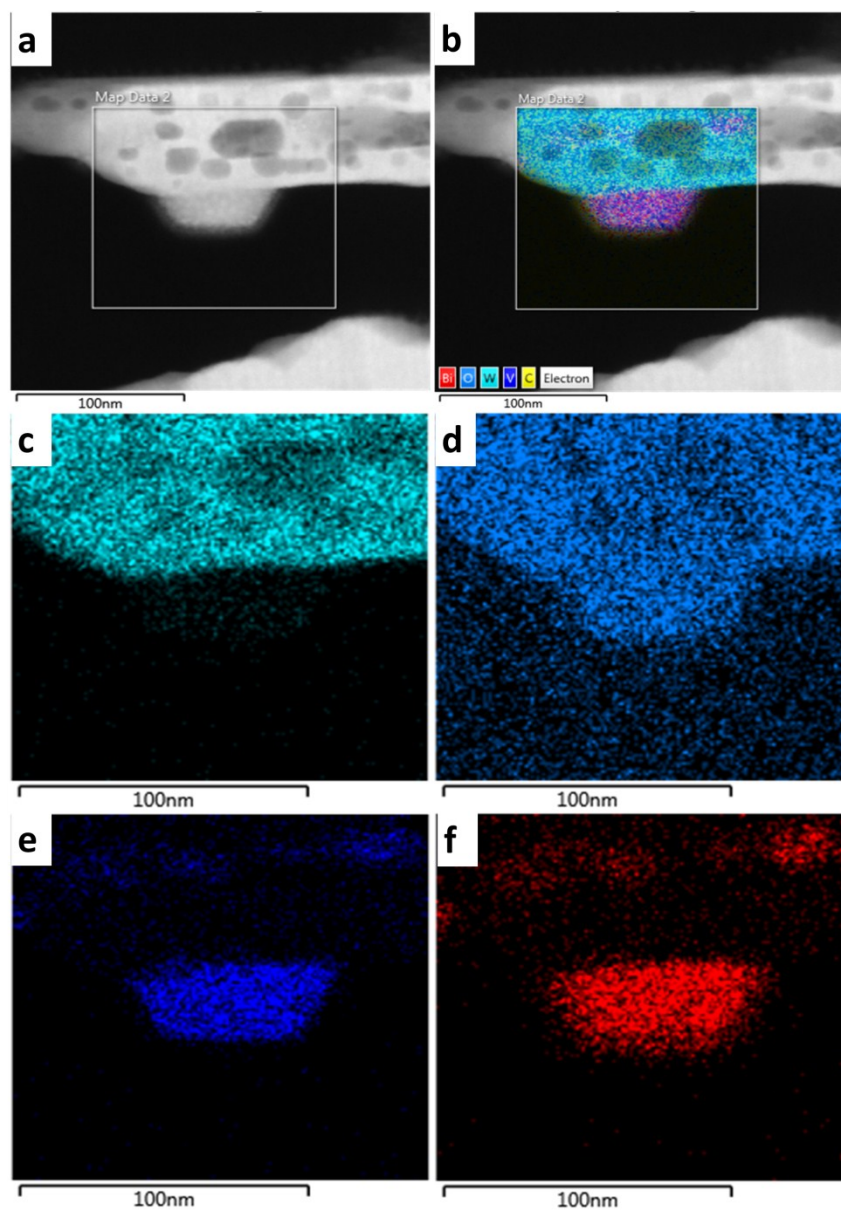

**Figure S5.** Elemental mapping for  $\text{WO}_3/\text{BiVO}_4$  showing the distribution each element, indicated by different colors. (a) STEM image of  $\text{WO}_3/\text{BiVO}_4$  in the selected area. (b) Mapped elements in the selected area. Elements (c) W, (d) O, (e) Bi, and (f) V are represented by different colors.

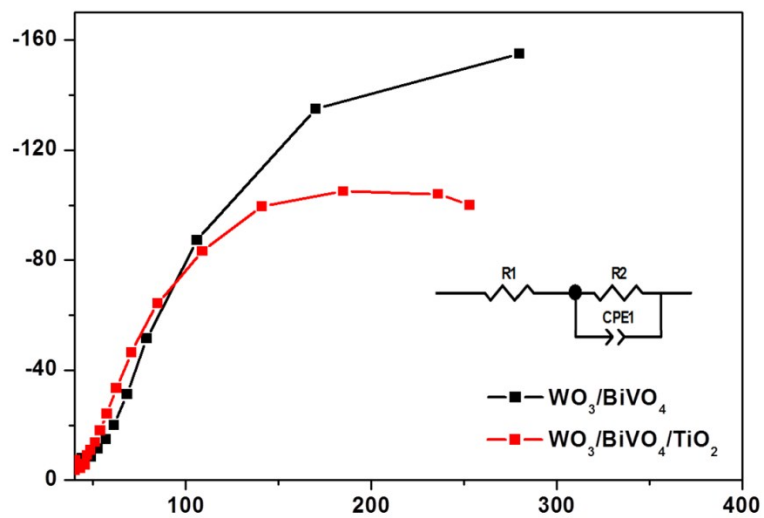

**Figure S6.** Nyquist plots obtained at 1.23 V Vs RHE under illumination for the  $\text{WO}_3/\text{BiVO}_4$  and  $\text{WO}_3/\text{BiVO}_4/\text{TiO}_2$ . R1 is the solution resistance; R2 is the charge transfer resistance between electrode and electrolyte. CPE1 is the constant phase element between electrode/electrolyte.

| Photoanode                                           | R1    | R2    | CPE1                    | n      |
|------------------------------------------------------|-------|-------|-------------------------|--------|
| WO <sub>3</sub> /BiVO <sub>4</sub>                   | 41.58 | 400.2 | 4.303x10 <sup>-5</sup>  | 0.9763 |
| WO <sub>3</sub> /BiVO <sub>4</sub> /TiO <sub>2</sub> | 51.11 | 267.7 | 3.694 x10 <sup>-5</sup> | 0.9763 |

**Table S1.** R1 is the solution resistance, R2 is the charge transfer resistance between electrode and electrolyte. CPE1 is the constant phase element between electrode/electrolyte. The impedance results showed that R2 and CPE1 decreased with the addition of TiO<sub>2</sub> layer.



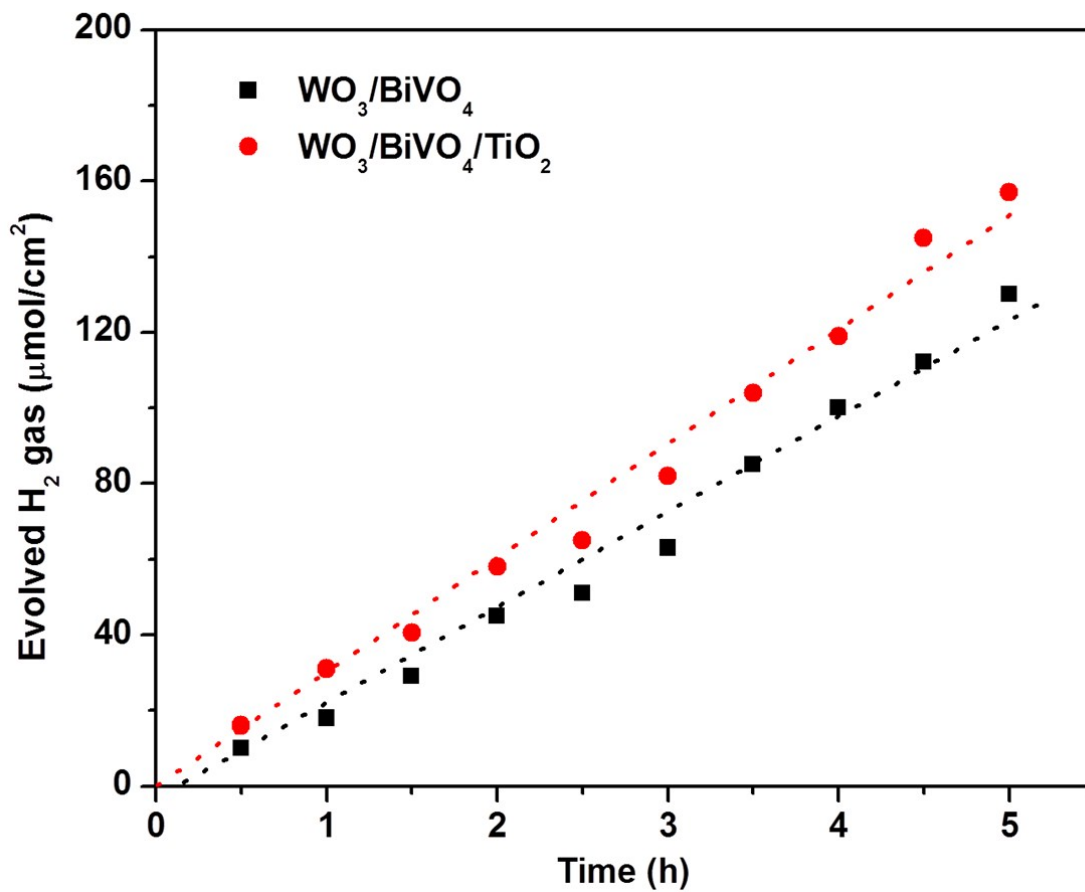

**Figure S7.** Time course curves of H<sub>2</sub> evolution (at 0.8 V vs Ag/AgCl) over the WO<sub>3</sub>/BiVO<sub>4</sub>/TiO<sub>2</sub> photoanode in a three-electrode cell under simulated sunlight.

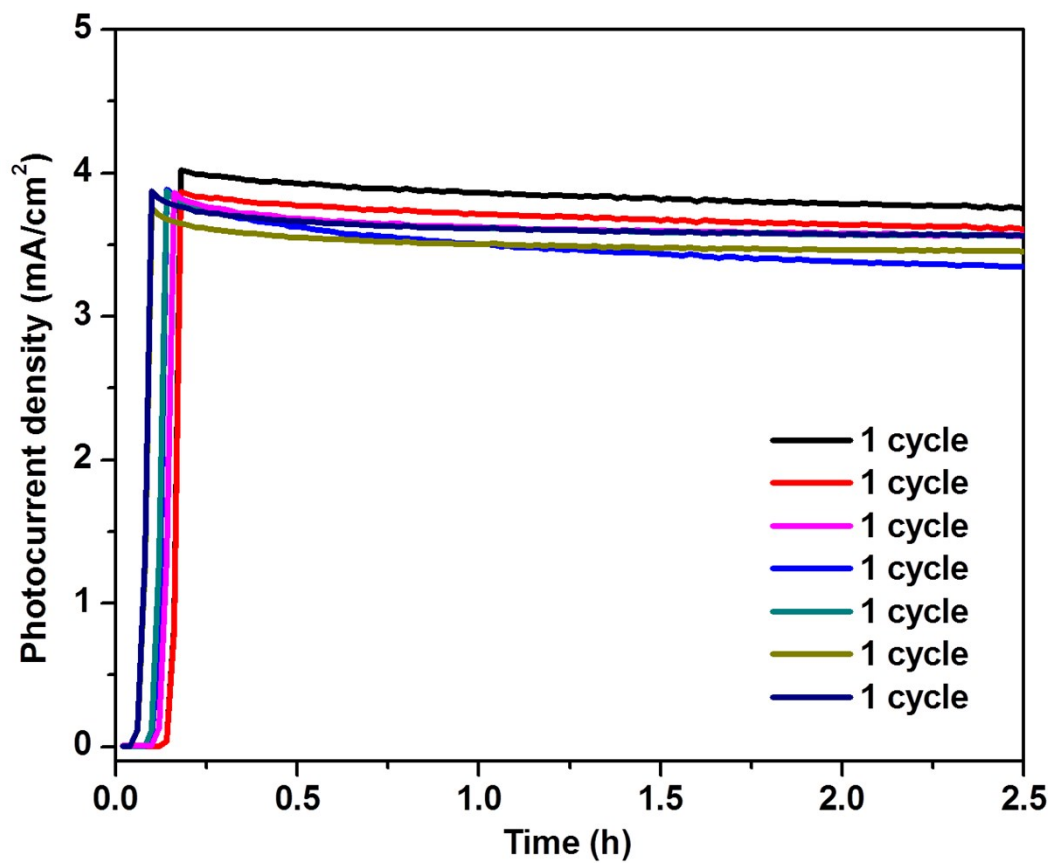

**Figure S8.** I-V characteristics of WO<sub>3</sub>/BiVO<sub>4</sub>/TiO<sub>2</sub> photoanode measure at 1.23 V vs RHE at different cycles.

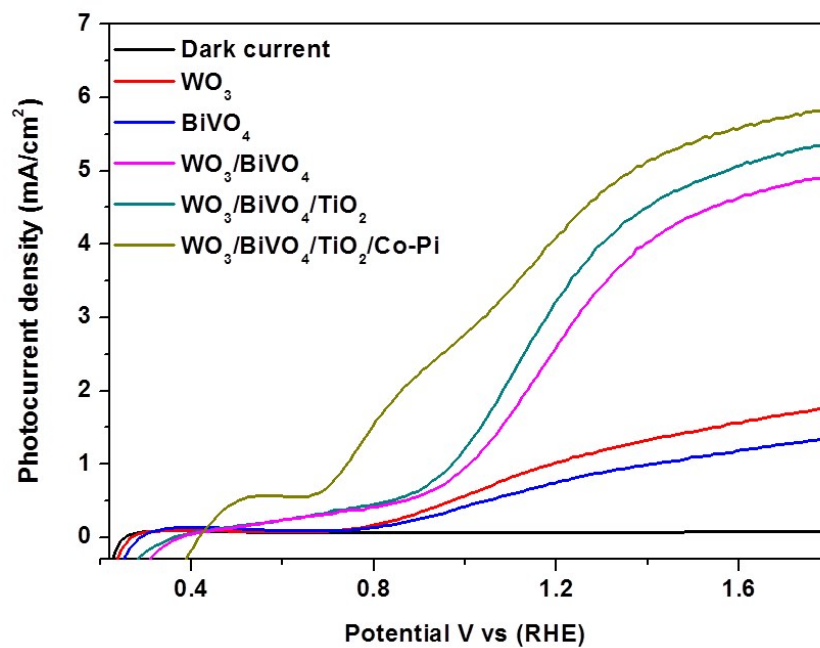

**Figure S9.** J-V plots for WO<sub>3</sub>, BiVO<sub>4</sub>, WO<sub>3</sub>/BiVO<sub>4</sub>, WO<sub>3</sub>/BiVO<sub>4</sub>/TiO<sub>2</sub>, and WO<sub>3</sub>/BiVO<sub>4</sub>/TiO<sub>2</sub>/Co-Pi under simulated solar illumination in a 0.1 M Na<sub>2</sub>SO<sub>4</sub> electrolyte.

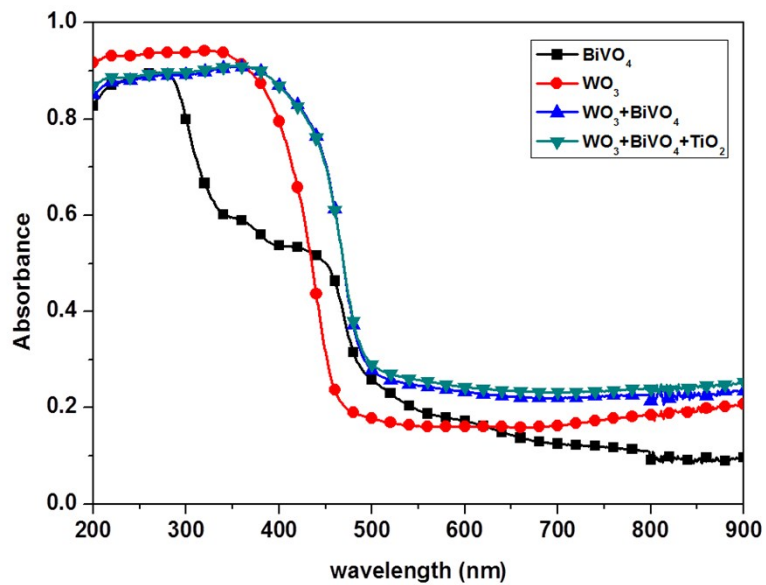

**Figure S10.** UV-Vis absorption curves for WO<sub>3</sub>, BiVO<sub>4</sub>, WO<sub>3</sub>/BiVO<sub>4</sub>, and WO<sub>3</sub>/BiVO<sub>4</sub>/TiO<sub>2</sub>.

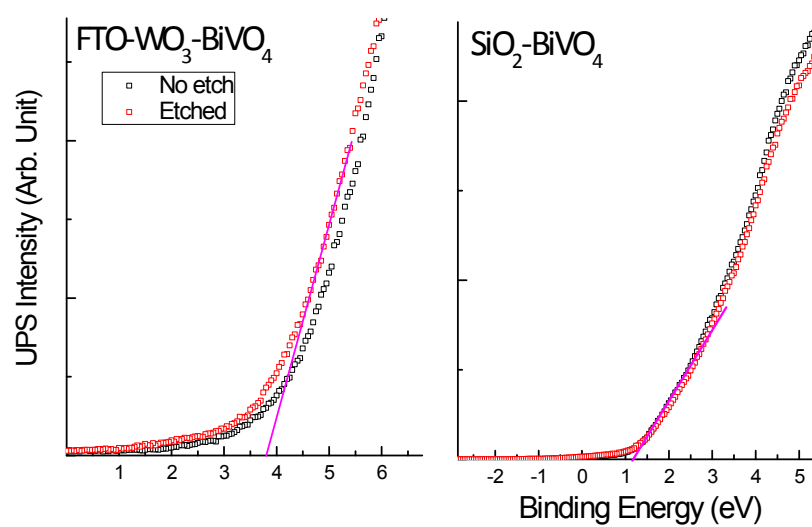

**Figure S11.** VBM of BiVO<sub>4</sub> is ~ 1.2 eV which is in consistent with XPS results. This indicates mid-gap like character of BiVO<sub>4</sub> surface based on E<sub>F</sub> position.

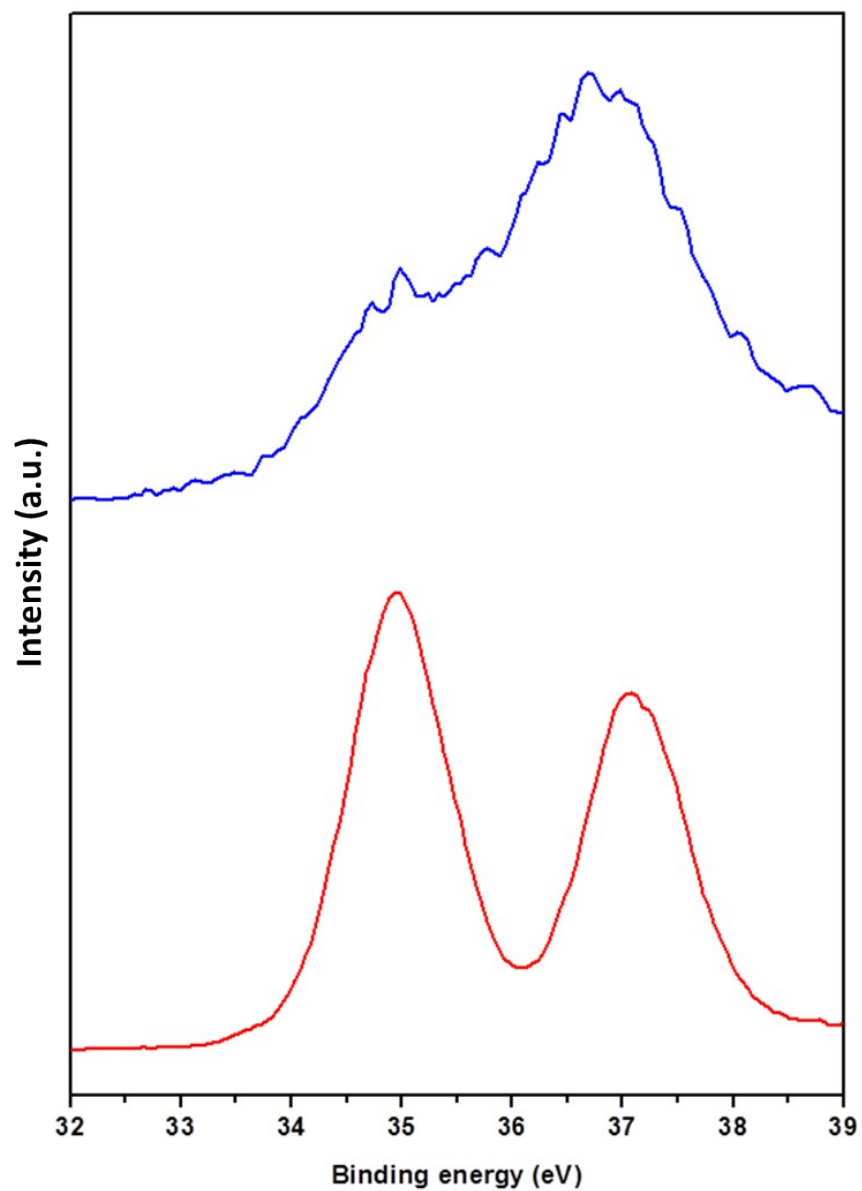

**Figure S12.** High-resolution XPS spectra of the W4f core level before (red line) and after (blue line) forming a heterojunction with BiVO<sub>4</sub>.
